# Supplementary material
Source: ML conference proceedings conference paper supplement (https://proceedings.neurips.cc/paper_files/paper/2023/hash/4ac4365b98bc242acd5ab974a05c68a8-Abstract.html)
Supplement: Supplementary file 1 [file 4ac4365b98bc242acd5ab974a05c68a8-Supplemental-Conference.pdf]

where the first inequality holds from  $\pi \geq \sin(2\psi) + 2\psi \geq 2\psi^* - 2\Delta_\psi^3$  and  $\cos(2\psi) - 1 \leq 0$ , the second inequality holds based on  $\theta \leq \tan \theta \leq \Delta_w$  and  $w_1 \leq 1 + \Delta_w$ , and the third inequality holds from  $\Delta_\psi \geq 0$ .

Combining Eqs. (9) and (10), one knows that the following holds for any  $(w_0, \psi_0) \in D$  and  $t \geq T_1$

$$L_{\text{cr}}(w_t, \psi_t) \leq \frac{1}{2\pi} \Delta_{\psi,t}^3 + \Delta_{w,t} \leq \frac{32\pi^3}{\eta^3(1-R^2)^3 t^3} + \left(1 - \frac{\eta}{48}\right)^{t-T_1}, \quad (11)$$

where the first inequality holds from  $\Delta_w^2 \leq \Delta_w$ , and the second inequality holds by Eqs. (7) and (8).

**Step 4: initialization falls into  $D$  with constant probability.** Let  $p_0 = \Pr[(w_0, \psi_0) \in D]$  for simplicity. From  $\psi_0 \sim \mathcal{U}(0, \pi/2)$ , the requirement  $\psi \in [0, \pi/2]$  is satisfied. Denote by  $p(w)$  the probability density function of  $\mathcal{N}(0, I_2)$ . Then one has

$$p_0 = \Pr[\|w_0 - v\| \leq R] = \int_{w \in B(v, R)} p(w) dw \geq \mu(B(v, R)) \min_{w \in B(v, R)} p(w) \geq \frac{R^2}{16}. \quad (12)$$

Let  $R^2 = 1/2$ . We obtain from Eqs. (11) and (12) that

$$\Pr \left[ L_{\text{cr}}(w_t, \psi_t) \leq \frac{8000}{\eta^3 t^3} + \left(1 - \frac{\eta}{48}\right)^{t+1-32/\eta} \right] \geq \frac{1}{32},$$

which completes the proof.  $\square$

## B.1 Optimization Behaviors

The following two lemmas indicate the linear convergence of  $w$  in  $D_1$  and  $D_2$ , respectively.

**Lemma 9.** Let  $w' = w - \eta \nabla_w L_{\text{cr}}(w, \psi)$ . If  $(w, \psi) \in D_1$  and  $\eta \in (0, 4)$ , then we have

$$\|w' - v\| \leq \left(1 - \frac{\eta}{4\pi} [\sin(2\psi) + 2\psi]\right) \|w - v\|.$$

**Proof.** For any  $(w, \psi) \in D_1$ , one has

$$\langle \nabla_w L_{\text{cr}}(w, \psi), w - v \rangle = \left\langle \frac{1}{4\pi} [\sin(2\psi) + 2\psi] (w - v), w - v \right\rangle = \frac{1}{4\pi} [\sin(2\psi) + 2\psi] \|w - v\|^2.$$

Meanwhile,

$$\|\nabla_w L_{\text{cr}}(w, \psi)\|^2 = \frac{1}{(4\pi)^2} [\sin(2\psi) + 2\psi]^2 \|w - v\|^2.$$

Then according to Lemma 13 and  $\psi \in [0, \pi/2]$ , for any  $\eta \in (0, 4)$ , one has

$$\|w' - v\| \leq \left(1 - \frac{\eta}{4\pi} [\sin(2\psi) + 2\psi]\right) \|w - v\|,$$

which completes the proof.  $\square$

**Lemma 10.** Let  $w' = w - \eta \nabla_w L_{\text{cr}}(w, \psi)$ . If  $(w, \psi) \in D_2$  and  $\eta \in (0, 1/(12\pi))$ , then we have

$$\|w' - v\| \leq \left(1 - \frac{\eta}{24\pi} [\sin(2\psi) + 2\psi]\right) \|w - v\|.$$

**Proof.** Firstly, we prove the strong convexity in  $D_2$ . For any  $(w, \psi) \in D_2$ , one has

$$\begin{aligned} & 2\pi \langle \nabla_w L_{\text{cr}}(w, \psi), w - v \rangle \\ &= - \left[ \frac{1}{2} \sin(2\psi) + \left( \frac{\pi}{2} + \psi - \theta \right) + \frac{w_1 |w_2|}{w_1^2 + w_2^2} \right] (w_1 - 1) + [\sin(2\psi) + 2\psi] w_1 (w_1 - 1) \\ & \quad - \left[ -\frac{1}{2} \cos(2\psi) + \frac{1}{2} - \frac{w_1^2}{w_1^2 + w_2^2} \right] |w_2| + [\sin(2\psi) + 2\psi] w_2^2 \\ &= [\sin(2\psi) + 2\psi] \|w - v\|^2 - R_1 - R_2, \end{aligned} \quad (13)$$

where

$$R_1 = \left[ \left( \frac{\pi}{2} - \psi - \theta \right) - \frac{1}{2} \sin(2\psi) \right] (w_1 - 1) \quad \text{and} \quad R_2 = \left[ \frac{1}{2} - \frac{1}{2} \cos(2\psi) - \frac{w_1}{w_1^2 + w_2^2} \right] |w_2|.$$



where the second inequality holds according to  $1 + \cos(2\psi) \geq \frac{1}{2}(\pi/2 - \psi)^2$  for any  $\psi \in [0, \pi/2]$  and  $\|\mathbf{w} - \mathbf{v}\| \leq R$ .

Secondly, we verify the lower bound for  $\nabla_\psi L_{\text{cr}}(\mathbf{w}, \psi)$ . It is observed that

$$\begin{aligned} 2\pi \nabla_\psi L_{\text{cr}}(\mathbf{w}, \psi) &\geq -[1 + \cos(2\psi)] - \sin(2\psi)|w_2| \\ &\geq -2 \left( \frac{\pi}{2} - \psi \right)^2 - \sin(2\psi)|w_2| \\ &\geq -2 \left( \frac{\pi}{2} - \psi \right)^2 - 2 \left( \frac{\pi}{2} - \psi \right) |w_2|, \end{aligned}$$

where the first inequality holds because of  $[1 + \cos(2\psi)]w_1 \geq 0$  and  $\|\mathbf{w} - \mathbf{v}\| \geq 0$ , the second inequality holds according to  $1 + \cos(2\psi) \leq 2(\pi/2 - \psi)^2$ , and the third inequality holds based on  $\sin(2\psi) \leq \pi - 2\psi$  for  $\psi \in [0, \pi/2]$ . Thus, we have completed the proof.  $\square$

## B.2 Convergence Rate Lemmas

The following lemma provides a sufficient condition for linear convergence of gradient descent.

**Lemma 13.** *If there exist two constants  $c_1$  and  $c_2$  such that*

$$\langle \nabla f(\mathbf{w}), \mathbf{w} - \mathbf{v} \rangle \geq c_1 \|\mathbf{w} - \mathbf{v}\|^2 \quad \text{and} \quad \|\nabla f(\mathbf{w})\|^2 \leq c_2 \|\mathbf{w} - \mathbf{v}\|^2,$$

*then  $\mathbf{w}' = \mathbf{w} - \eta \nabla f(\mathbf{w})$  with  $\eta \in (0, 2c_1/c_2)$  and  $c = \sqrt{1 - 2c_1\eta + c_2\eta^2} \in (0, 1)$  satisfies*

$$\|\mathbf{w}' - \mathbf{v}\| \leq c \|\mathbf{w} - \mathbf{v}\|.$$

**Proof.** It is observed that

$$\begin{aligned} \|\mathbf{w}' - \mathbf{v}\|^2 &= \|\mathbf{w} - \eta \nabla f(\mathbf{w}) - \mathbf{v}\|^2 \\ &= \|\mathbf{w} - \mathbf{v}\|^2 - 2\eta \langle \nabla f(\mathbf{w}), \mathbf{w} - \mathbf{v} \rangle + \eta^2 \|\nabla f(\mathbf{w})\|^2 \\ &\leq (1 - 2c_1\eta + c_2\eta^2) \|\mathbf{w} - \mathbf{v}\|^2. \end{aligned}$$

For  $\eta \in (0, 2c_1/c_2)$ , the coefficient  $1 - 2c_1\eta + c_2\eta^2$  is smaller than 1, which completes the proof.  $\square$

The following lemma gives a sufficient condition for convergence with an inversely proportional rate.

**Lemma 14.** *Let  $\{a_t\}_{t=0}^\infty \subset [0, 1/2]$  represent a real-valued sequence.*

1. *If  $a_{t+1} \leq a_t(1 - a_t)$ , then  $a_t \leq \frac{1}{t+1}$ .*
2. *If  $a_{t+1} \geq a_t(1 - a_t)$ , then  $a_t \geq \frac{a_0}{t+1}$ .*

**Proof.** We prove the first conclusion by mathematical induction.

1. Base case. For  $t = 0$ , the conclusion holds from  $a_0 \leq 1/2 \leq 1$ .
2. Induction. Suppose that the conclusion holds for  $t = k$  with  $k \in \mathbb{N}$ . Then it is observed that

$$a_{t+1} \leq \frac{1}{k+1} \left( 1 - \frac{1}{k+1} \right) = \frac{k}{(k+1)^2} \leq \frac{1}{k+2},$$

where the first inequality holds from the induction hypothesis and the monotonicity of  $x(1 - x)$  for  $x \in [0, 1/2]$ . Thus, the conclusion holds for  $t = k + 1$ .

Therefore, mathematical induction completes the proof of the first conclusion.

We proceed to verify the second conclusion by mathematical induction.

1. Base case. For  $t = 0$ , the conclusion holds from  $a_0 \geq a_0$ .
2. Induction. Suppose that the conclusion holds for  $t = k$  with  $k \in \mathbb{N}$ . Then one has

$$a_{t+1} \geq \frac{a_0}{k+1} \left( 1 - \frac{a_0}{k+1} \right) = \frac{a_0(k+1 - a_0)}{(k+1)^2} \geq \frac{a_0}{k+2},$$

where the first inequality holds from the induction hypothesis and the monotonicity of  $x(1 - x)$  for  $x \in [0, 1/2]$ , and the second inequality holds based on  $a_0 \leq 1/2$ . Thus, the conclusion holds for  $t = k + 1$ .

Therefore, mathematical induction completes the proof.  $\square$

### B.3 Technical Lemmas

We present upper bounds for some small terms used in the proof.

**Lemma 15.** *Let  $R_1 = \left[ \left( \frac{\pi}{2} - \psi - \theta \right) - \frac{1}{2} \sin(2\psi) \right] (w_1 - 1)$ . If  $(\mathbf{w}, \psi) \in D_2$ , then*

$$R_1 \leq \frac{1}{2} [\sin(2\psi) + 2\psi] \|\mathbf{w} - \mathbf{v}\|^2.$$

**Proof.** Let  $r = \sqrt{w_1^2 + w_2^2}$  denote the norm of  $\mathbf{w}$ . Then according to the definition of  $\theta$ , one has  $w_1 = r \cos \theta$  and  $|w_2| = r \sin \theta$ . Thus, we can rewrite  $R_1$  as

$$R_1 = \left[ \left( \frac{\pi}{2} - \psi - \theta \right) - \frac{1}{2} \sin(2\psi) \right] (r \cos \theta - 1).$$

We provide the upper bound for  $R_1$  by discussion.

1. Suppose  $r \cos \theta - 1 \geq 0$ . Based on the definition of  $D_2$ , we have  $\frac{\pi}{2} - \psi - \theta \leq 0$ . Meanwhile,  $\psi \in [0, \pi/2]$  indicates  $\sin(2\psi) \geq 0$ . Thus, one knows  $R_1 \leq 0$ .
2. Suppose  $r \cos \theta - 1 < 0$ .  $R_1$  can be rewritten as

$$R_1 = \frac{1}{2} [\sin(2\psi) + 2\psi] (1 - 2r \cos \theta + r^2) + \tilde{R}, \quad (17)$$

where

$$\tilde{R} = \frac{1}{2} [\sin(2\psi) + 2\psi] r (\cos \theta - r) + \left( \frac{\pi}{2} - \theta \right) (r \cos \theta - 1).$$

If  $\cos \theta - r \leq 0$ , it is observed that  $\tilde{R} \leq 0$  because of  $\psi, \theta \in [0, \pi/2]$  and  $r \cos \theta - 1 < 0$ . If  $\cos \theta - r > 0$ , then

$$\tilde{R} \leq \frac{\pi}{2} r (\cos \theta - r) + \left( \frac{\pi}{2} - \theta \right) (r \cos \theta - 1) = -\frac{\pi}{2} r^2 + (\pi - \theta) \cos \theta r - \left( \frac{\pi}{2} - \theta \right) =: f(r),$$

where the inequality holds since  $\sin(2\psi) + 2\psi$  is monotonically increasing. The discriminant of  $f$  is

$$\Delta(\theta) = (\pi - \theta)^2 \cos^2 \theta - \pi(\pi - 2\theta) \leq \frac{1}{\pi^2} \theta^2 (\pi - 2\theta)(2\theta - 3\pi),$$

where the first inequality holds since  $\cos^2 \theta \leq 1 - 4\theta^2/\pi^2$  on  $[0, \pi/2]$ . According to  $\theta \in [0, \pi/2]$ , one knows  $\Delta(\theta) \leq 0$ , which indicates  $f(r) \leq 0$ , and thus,  $\tilde{R} \leq 0$  when  $\cos \theta - r \leq 0$ . Combining the cases above, we obtain  $\tilde{R} \leq 0$ , which, together with Eq. (17), implies  $R_1 \leq \frac{1}{2} [\sin(2\psi) + 2\psi] (1 - 2r \cos \theta + r^2)$ .

Combining the cases above, one knows

$$R_1 \leq \frac{1}{2} [\sin(2\psi) + 2\psi] (1 - 2r \cos \theta + r^2) = \frac{1}{2} [\sin(2\psi) + 2\psi] \|\mathbf{w} - \mathbf{v}\|^2,$$

which completes the proof.  $\square$

**Lemma 16.** *Let  $R_2 = \left[ \frac{1}{2} - \frac{1}{2} \cos(2\psi) - \frac{w_1}{w_1^2 + w_2^2} \right] |w_2|$ . If  $(\mathbf{w}, \psi) \in D_2$ , then*

$$R_2 \leq \frac{1}{\pi} [\sin(2\psi) + 2\psi] \|\mathbf{w} - \mathbf{v}\|^2.$$

**Proof.** Let  $r = \sqrt{w_1^2 + w_2^2}$  denote the norm of  $\mathbf{w}$ . Then according to the definition of  $\theta$ , one has  $w_1 = r \cos \theta$  and  $|w_2| = r \sin \theta$ . Thus, we can rewrite  $R_2$  as

$$R_2 = \left[ \frac{r}{2} (1 - \cos(2\psi)) - \cos \theta \right] \sin \theta.$$

We provide the upper bound for  $R_2$  by discussion.

1. Suppose  $\frac{r}{2} [1 - \cos(2\psi)] - \cos \theta \leq 0$ . From  $\theta \in [0, \pi/2]$ , we have  $R_2 \leq 0$ .

























**Step 3:  $w$  converges faster than  $\psi$ .** For any  $t \geq T_2$ , Lemmas 11 and 12 imply

$$\langle \nabla_{\psi} L_{\text{cr}}(w_t, \psi_t), \psi_t - \psi^* \rangle \leq 2(\psi^* - \psi_t)^3 + 2(\psi^* - \psi_t)^2 |w_{2,t}| \leq \frac{1}{96}(\psi^* - \psi_t)^2,$$

where the second inequality holds based on Eq. (44). Then Lemma 31 indicates

$$\psi^* - \psi_{t+1} \geq \sqrt{1 - \eta/48}(\psi^* - \psi_t) \quad \text{for } t \geq T_2,$$

which, together with Eq. (43), indicates

$$|w_{w,t}| \leq \|w_t - v\| \leq \psi^* - \psi_t \quad \text{with } t \geq T_3 = 2T_1 + \frac{T_2 \ln(1 - 12\eta) + 2 \ln(\psi^* - \psi_0)}{\ln(1 - \eta/48)}. \quad (45)$$

**Step 4:  $\psi$  converges with an inversely proportional rate.** For any  $t \geq T_3$ , it is observed from Lemmas 11, 12, and Eq. (45) that

$$\nabla_{\psi} L_{\text{cr}}(w_t, \psi_t) \geq -4(\psi^* - \psi)^2.$$

Let  $a_t = 4\eta(\psi^* - \psi_t)$ . Then the updating rule implies  $a_{t+1} \geq a_t(1 - a_t)$ . Choosing  $\eta \in (0, 1/(4\pi))$  guarantees  $a_t \in [0, 1/2]$ . Then Lemma 14 indicates

$$\psi^* - \psi_t \geq \frac{(1 - 12\eta)^{T_3/2}(\psi^* - \psi_0)}{t - T_3 + 1} \quad \text{for } t \geq T_3. \quad (46)$$

**Step 5: the loss converges to 0 with an inversely proportional rate.** Define non-negative quantities  $\Delta_w = \|w - v\|$  and  $\Delta_{\psi} = \psi^* - \psi$ . We provide a lower bound for  $L_{\text{cr}}$  by discussion.

1. Suppose  $(w, \psi) \in D_1$ . Then we have

$$L_{\text{cr}}(w, \psi) \geq \frac{1}{4} - \frac{1}{8\pi}(4\psi^* - \Delta_{\psi}^3)(1 - \Delta_w^2) = \frac{1}{8\pi}\Delta_{\psi}^3 + \frac{1}{8\pi}\Delta_w^2(2\pi - \Delta_{\psi}^3) \geq \frac{1}{8\pi}\Delta_{\psi}^3, \quad (47)$$

where the first inequality holds based on  $\sin(2\psi) + 2\psi = \sin(2\Delta_{\psi}) + 2\psi^* - 2\Delta_{\psi} \leq 2\psi^* - \Delta_{\psi}^3/2$  for any  $\psi \in [0, \pi/2]$ , and the second inequality holds from  $\Delta_{\psi} \leq \pi/2$ .

2. Suppose  $(w, \psi) \in D_2$ . The expected loss can be rewritten as

$$\begin{aligned} L_{\text{cr}}(w, \psi) &= \frac{1}{4} - \frac{1}{4\pi}[\sin(2\psi) + 2\psi](1 - \Delta_w^2) \\ &\quad + \frac{1}{4\pi}[(\cos(2\psi) - 1)|w_2| + (\sin(2\psi) + 2\psi + 2\theta - 2\psi^*)w_1] \\ &\geq \frac{1}{4} - \frac{1}{8\pi}(4\psi^* - \Delta_{\psi}^3)(1 - \Delta_w^2) + \frac{1}{4\pi}[(\cos(2\psi) - 1)|w_2|] \\ &\geq \frac{1}{4} - \frac{1}{8\pi}(4\psi^* - \Delta_{\psi}^3)(1 - \Delta_w^2) - \frac{1}{2\pi}\Delta_w \\ &\geq \frac{1}{8\pi}\Delta_{\psi}^3 - \frac{1}{2\pi}\Delta_w, \end{aligned} \quad (48)$$

where the first inequality holds from  $\sin(2\psi) + 2\psi \leq 2\psi^* - \Delta_{\psi}^3/2$  and  $\sin(2\psi) + 2\psi + 2\theta - 2\psi^* \geq 0$ , the second inequality holds based on  $\cos(2\psi) - 1 \geq -2$  and  $|w_2| \leq \Delta_w$ .

Combining Eqs. (47) and (48), one knows that the following holds for any  $(w_0, \psi_0) \in D$  and  $t \geq T_3$

$$L_{\text{cr}}(w_t, \psi_t) \geq \frac{1}{8\pi}\Delta_{\psi,t}^3 - \frac{1}{2\pi}\Delta_{w,t} \geq \frac{(1 - 12\eta)^{3T_3/2}(\psi^* - \psi_0)^3}{8\pi(t - T_3 + 1)^3} - \frac{1}{2\pi}\left(1 - \frac{\eta}{48}\right)^{t-T_3},$$

where the second inequality holds from Eqs. (43) and (46). Thus, we have completed the proof.  $\square$

## F Simulation Experiments

**Experimental settings.** A training set of size 7,000 and a test set of size 3,000 are generated by a randomly initialized target neuron (can be a real-valued or a complex-valued neuron). After random initialization, a complex-valued neuron and a real-valued neuron are trained by gradient descent with

the empirical mean square loss and a learning rate of 0.1 for 100 epochs (or 300 epochs when the loss does not converge).

**Experimental results.** It should be noticed that a complex-valued neuron cannot always learn a target neuron. From the theoretical formulation, our convergence rate holds with a small constant probability. From the loss landscape, there exist constant pieces in the parameter space, i.e., the complex-valued neuron does not learn anything after initialization. Thus, we cannot expect a complex-valued neuron to learn a target neuron all the time. In the experiments, we train the complex-valued neuron with several random initializations and find that our theoretical conclusions occur in experiments. This phenomenon verifies our theories and also motivates a novel learning algorithm for CVNNs, as discussed in the conclusion part.
